# Supplementary material
Source: publisher site journal article supplement (https://www.dovepress.com/article/258251)
Supplement: Supplementary file 1 [file get_supplementary_file.php]

|  | Gender | Age, year | AFP (ng/ml) | TBIL (umol/L) | AST (U/L) | Main Tumor Size (cm) | TNM stage |
| --- | --- | --- | --- | --- | --- | --- | --- |
| Patient 1 | Male | 57 | 175 | 46 | 65.76 | 3.2 | II |
| Patient 2 | Male | 53 | 36.89 | 15.9 | 25.1 | 2.7 | I |
| Patient 3 | Female | 53 | 103.32 | 16.3 | 27.8 | 2.8 | I |

**Table S1. Baseline Characteristics of Patients.**

Abbreviations: AFP, alpha-fetoprotein; TBIL, total bilirubin; AST, aspartate aminotransferase; TNM, Tumor Node Metastasis.
